# Supplementary material for: Direct conversion of cellulose into isosorbide over Ni doped NbOPO4 catalysts in water
Source: Royal Society of Chemistry journal article supplement (doi:10.1039/d0nj01403f), 2020-01-01
Supplement: d0nj01403f1.pdf [file d0nj01403f1.pdf]

## Direct conversion of cellulose into isosorbide over Ni doped NbOPO<sub>4</sub> catalysts in water

Minyao He,<sup>abc</sup> Jiaxing Guo,<sup>ab</sup> Xincheng Wang,<sup>\*ab</sup> Yongji Song,<sup>ab</sup> ShanShan Liu,<sup>ab</sup> Hong Wang,<sup>ab</sup> and Cuiqing Li<sup>ab</sup>

<sup>a</sup> College of Chemical Engineering, Beijing Institute of Petrochemical Technology, Beijing 102617, China.

<sup>b</sup> Beijing Key Laboratory of Fuels Cleaning and Advanced Catalytic Emission Reduction Technology, Beijing 102617, China. E-mail: [wxcnathan@gmail.com](mailto:wxcnathan@gmail.com); [wangxc@bipt.edu.cn](mailto:wangxc@bipt.edu.cn).

<sup>c</sup> Beijing University of Chemical Technology, Beijing 100029, China.

### Contents

**Fig. S1** Long-term running of the reaction under optimized reaction conditions.

**Fig. S2** TEM images of 70Ni/NbOPO<sub>4</sub> after calcination in a H<sub>2</sub> atmosphere at 450 °C for 3 h.

**Table S1** Conversion of cellulose over catalysts with different Ni loadings after 24 h.

**Table S2** Comparison of the current work with previous reports using Ru-based catalysts

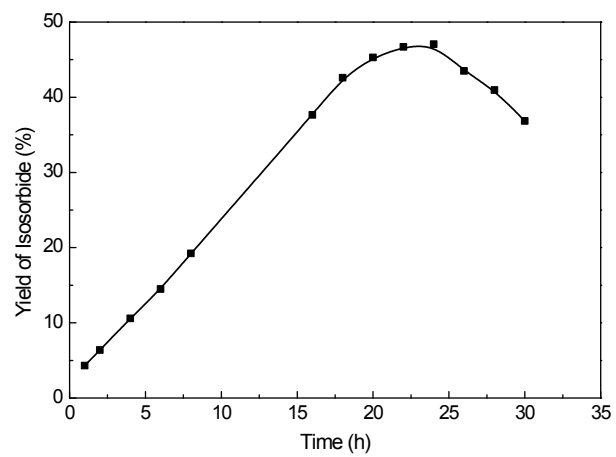

**Fig. S1** Long-term running of the reaction under optimized reaction conditions.

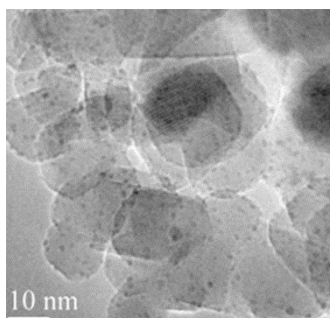

**Fig. S2** TEM images of 70Ni/NbOPO<sub>4</sub> after calcination in a H<sub>2</sub> atmosphere at 450 °C for 3 h.

**Table S1** Conversion of cellulose over catalysts with different Ni loadings after 24 h (conditions: cellulose=0.5 g, Ni/NbOPO<sub>4</sub> = 0.5 g, 80 mL H<sub>2</sub>O, 3 MPa H<sub>2</sub>, 200 °C).

| Ni loading (%) | Conversion (%) | Yield (%)  |          |              |          |         |
|----------------|----------------|------------|----------|--------------|----------|---------|
|                |                | Isosorbide | Sorbitol | 1,4-sorbitan | Mannitol | Glucose |
| 10             | 40.86          | 5.07       | 0.97     | 1.07         | 3.2      | 1.9     |
| 20             | 71.23          | 21.76      | 0.63     | 2.25         | 4.02     | 1.34    |
| 30             | 88.97          | 30.73      | 6.26     | 6.76         | 4.88     | 0.37    |
| 40             | 95.33          | 33.69      | 7.03     | 5.77         | 5.03     | 0.48    |
| 50             | 98.94          | 35.13      | 7.42     | 6.93         | 6.85     | 0.67    |
| 60             | 100            | 36.47      | 7.01     | 7.24         | 7.34     | 0.94    |
| 70             | 100            | 47.19      | 9.86     | 5.55         | 8.29     | 0.11    |
| 80             | 100            | 42.63      | 9.73     | 8.98         | 8.8      | 0.86    |
| 90             | 100            | 42.97      | 8.88     | 7.07         | 7.62     | 0.46    |

**Table S2** Comparison of the current work with previous reports using Ru-based catalysts

| Entry | material              | Catalyst                                                                                      | Reaction conditions                               | Yield of isosorbide /% | References |
|-------|-----------------------|-----------------------------------------------------------------------------------------------|---------------------------------------------------|------------------------|------------|
| 1     | cellulose             | HCl + Ru/C                                                                                    | 215°C, 6 MPa H <sub>2</sub> , 6h                  | 49.5                   | 18         |
| 2     | wheat straw pulp      | H <sub>4</sub> SiW <sub>12</sub> O <sub>40</sub> + Ru/C                                       | 210°C, 5 MPa H <sub>2</sub> , 1h                  | 63                     | 19         |
| 3     | lignocellulosic       | H <sub>4</sub> SiW <sub>12</sub> O <sub>40</sub> + Ru/C                                       | 210°C, 5 MPa H <sub>2</sub> , 5h                  | 52                     | 19         |
| 4     | cellulose             | Amberlyst 70 + Ru/C                                                                           | 190°C, 5 MPa H <sub>2</sub> , 6h                  | 55.8                   | 20         |
| 5     | cellulose             | Ru <sup>2.2</sup> /Fe <sub>3</sub> O <sub>4</sub> @void@PMO-SO <sub>3</sub> H <sup>0.43</sup> | 220°C, 6 MPa H <sub>2</sub> , 2h                  | 58.1                   | 21         |
| 6     | cellulose             | Ru/NbOPO <sub>4</sub> -pH2 + NbOPO <sub>4</sub> -pH2                                          | 170°C, 4 MPa H <sub>2</sub> , 24h +<br>230°C, 18h | 56.7                   | 22         |
| 7     | cellulose             | Ru <sup>5.5</sup> @mNbPO                                                                      | 220°C, 6 MPa H <sub>2</sub> , 1h                  | 52                     | 23         |
| 8     | ball-milled cellulose | Ni/NbOPO <sub>4</sub>                                                                         | 200°C, 3 MPa H <sub>2</sub> , 24h                 | 47.2                   | this work  |
